# Supplementary material
Source: PubMed Central journal article supplement (PMC7686907)

## Supplemental Information

**Supplemental Table 1.** Efficacy of single-agent ibrutinib in MZL subtypes

| <b>Outcome</b>               | <b>Splenic, n (%)</b><br><b>n=13</b> | <b>Nodal, n (%)</b><br><b>n=17</b> | <b>Extranodal, n (%)</b><br><b>n=30</b> | <b>Total, n (%)</b><br><b>N=60</b> |
|------------------------------|--------------------------------------|------------------------------------|-----------------------------------------|------------------------------------|
| Overall response rate        | 8 (62)                               | 8 (47)                             | 19 (63)                                 | 35 (58)                            |
| Complete response            | 1 (8)                                | 0                                  | 5 (17)                                  | 6 (10)                             |
| Partial response             | 7 (54)                               | 8 (47)                             | 14 (47)                                 | 29 (48)                            |
| Stable disease               | 3 (23)                               | 6 (35)                             | 9 (30)                                  | 18 (30)                            |
| Progressive disease          | 0                                    | 2 (12)                             | 1 (3)                                   | 3 (5)                              |
| Median DOR, months, (95% CI) | NE<br>(5.4-NE)                       | NE<br>(2.8-NE)                     | 27.6<br>(7.3-NE)                        | 27.6<br>(12.1-NE)                  |
| Median PFS, months, (95% CI) | 18.5<br>(5.2-NE)                     | 8.3<br>(5.6-30.3)                  | 22.5<br>(12.2-NE)                       | 15.7<br>(12.2-30.4)                |

CI indicates confidence interval; DOR, duration of response; MZL, marginal zone lymphoma;

NE, not estimable; and PFS, progression-free survival.

**Supplemental Figure 1. Response over time in subgroups.** (A) Response over time in patients treated with prior RTX. (B) Response over time in patients treated with prior RTX-CIT. # indicates discontinuation of study treatment; + indicates death. CR indicates complete response; NE, not evaluable; PD, progressive disease; PR, partial response; RTX, rituximab; RTX-CIT, rituximab-based chemoimmunotherapy; and SD, stable disease.

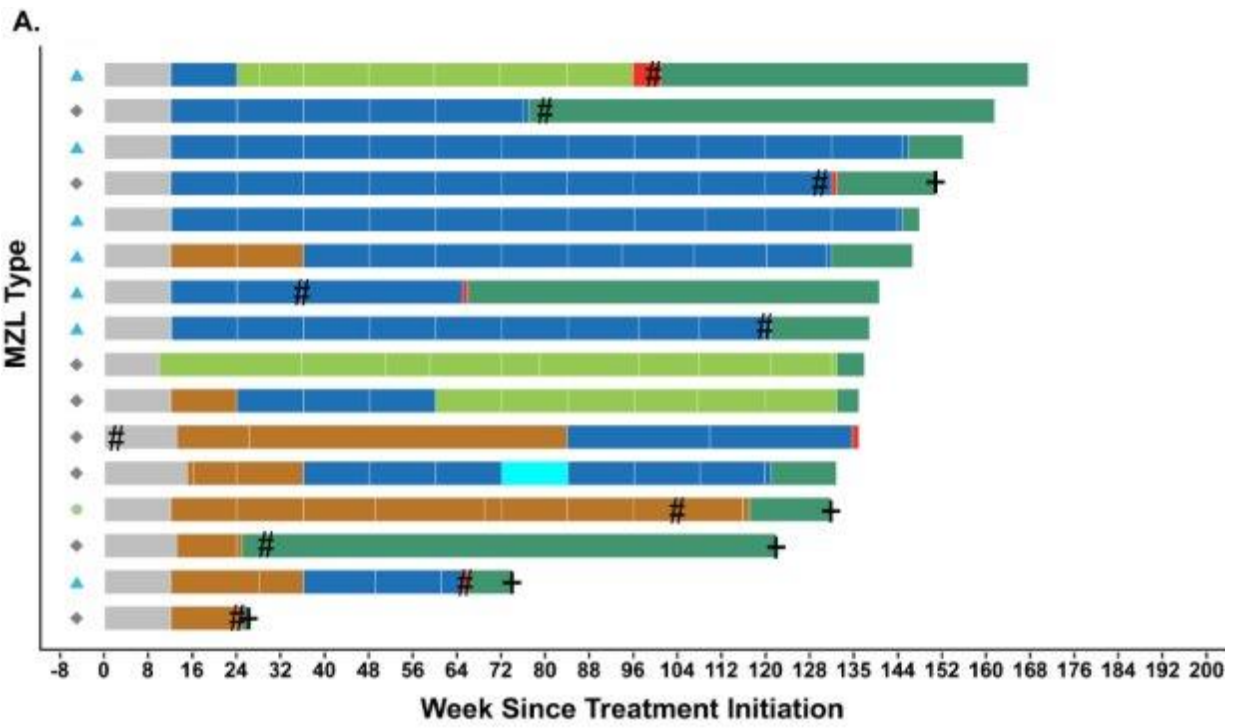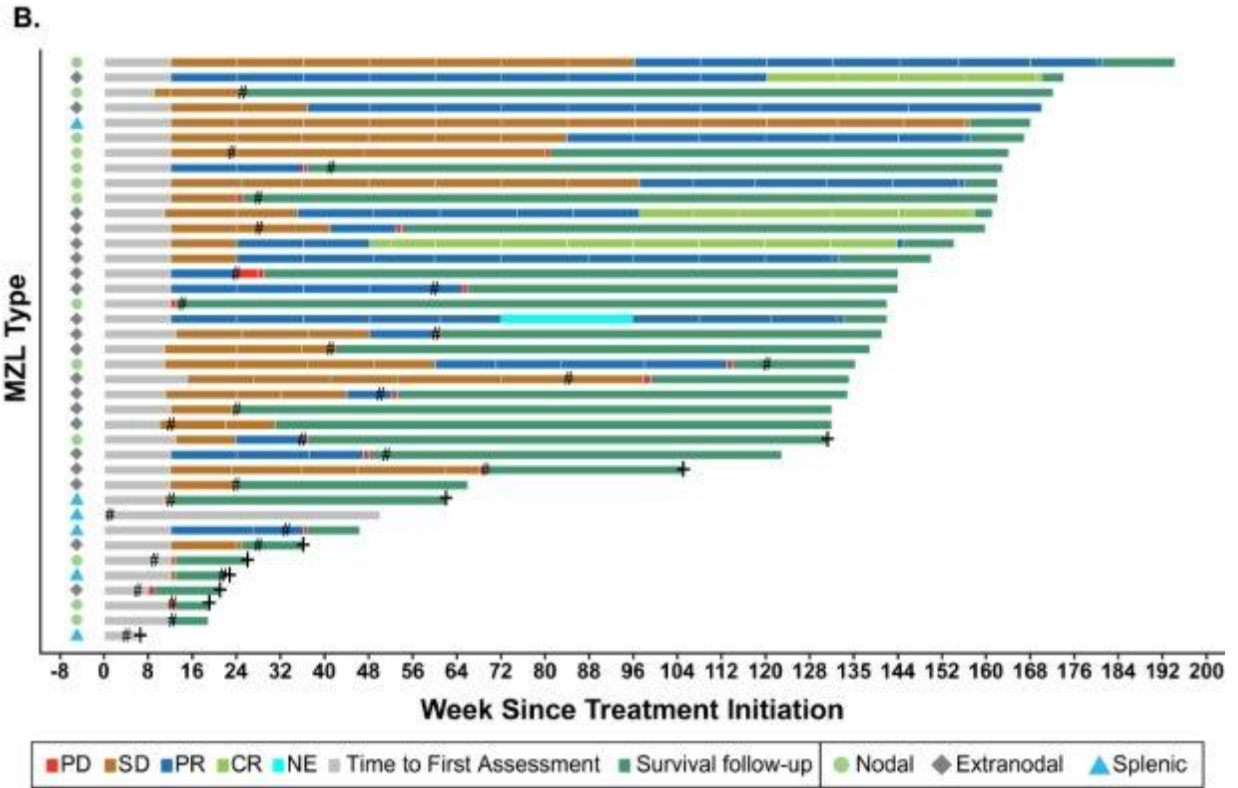

**Supplemental Figure 2. Progression-free survival by marginal zone lymphoma subtype.**

PFS indicates progression-free survival.

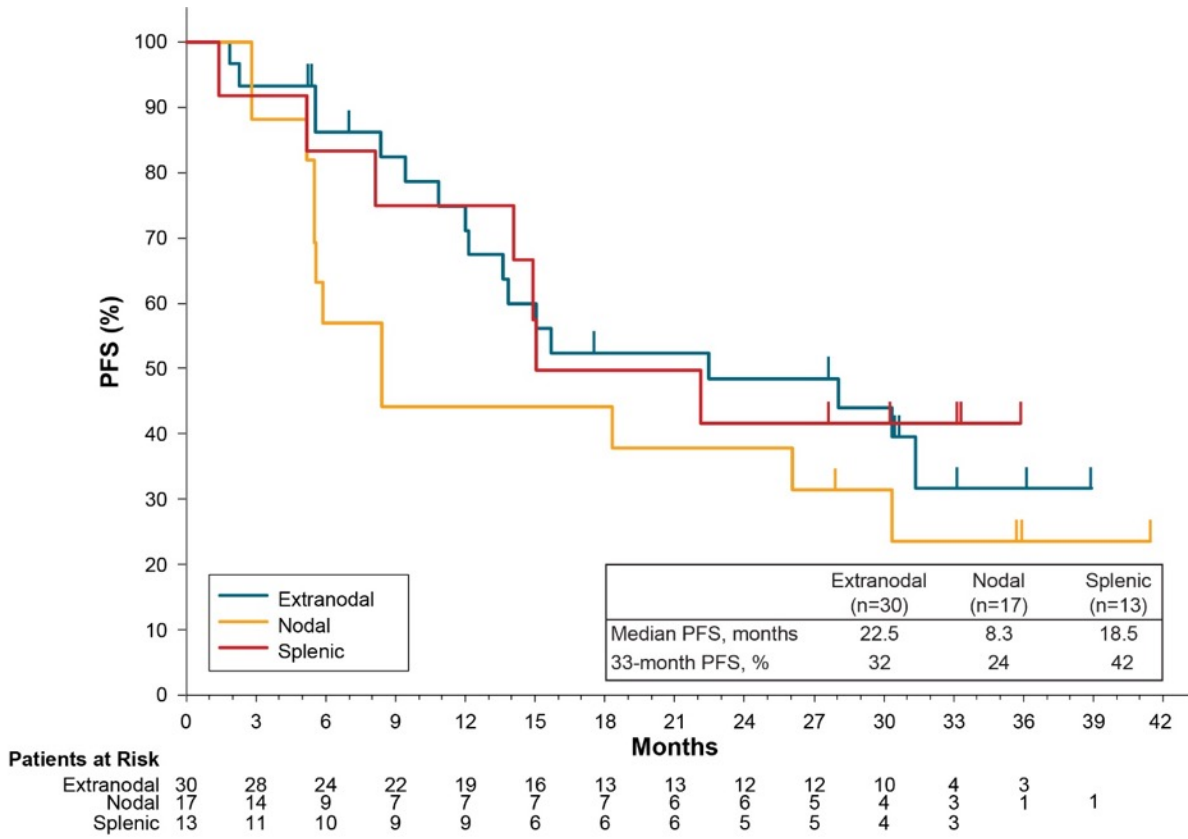

**Supplemental Figure 3. Overall survival by marginal zone lymphoma subtype. NE**

indicates not evaluable; OS, overall survival.

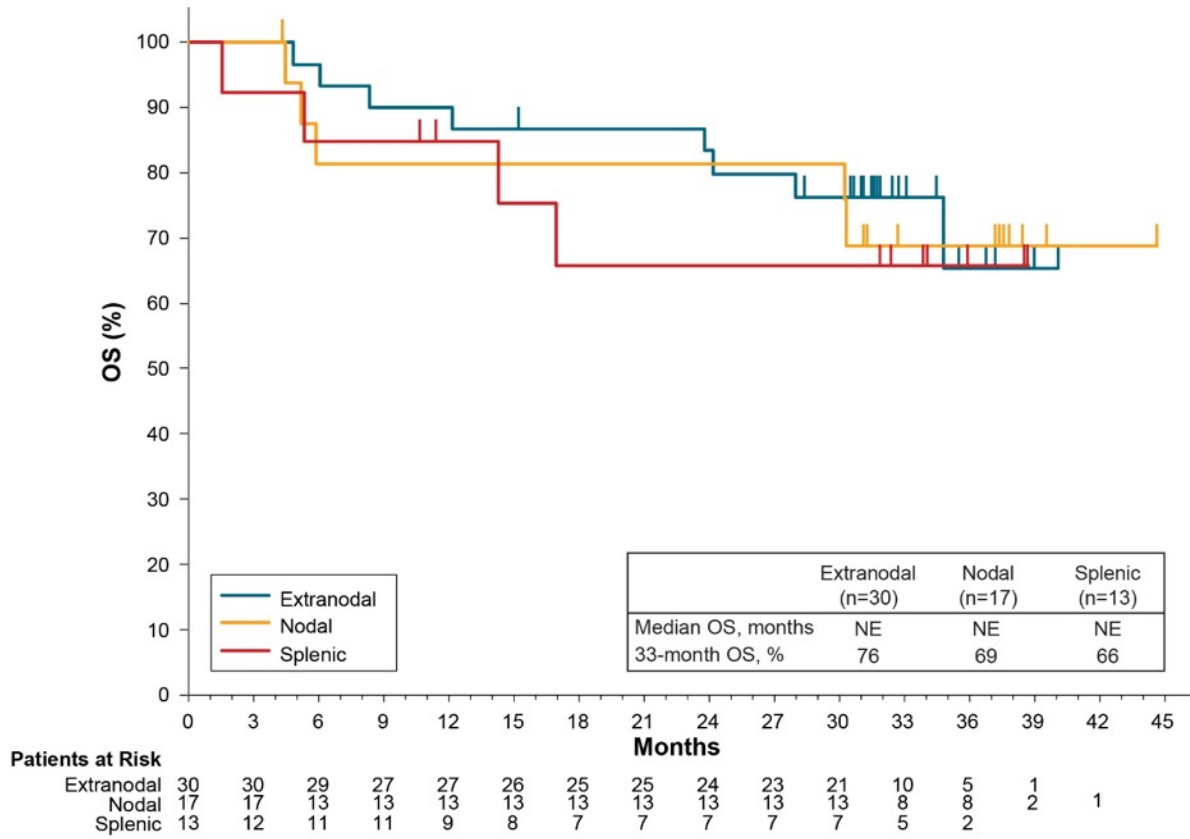

Supplement: advancesADV2020003121-suppl1.pdf [file advancesADV2020003121-suppl1.pdf]
